# Supplementary material for: Quercetin Liposomal Nanoformulation for Ischemia and Reperfusion Injury Treatment
Source: MDPI journal article supplement (doi:10.3390/pharmaceutics14010104), 2022-01-03
Supplement: s1 [file s1]

# Supplementary Materials: Quercetin Liposomal Nanoformulation for Ischemia and Reperfusion Injury Treatment

Margarida Ferreira-Silva, Catarina Faria-Silva, Manuela C. Carvalheiro, Sandra Simões, H. Susana Marinho, Paulo Marcelino, M. Celeste Campos, Josbert M. Metselaar, Eduarda Fernandes, Pedro V. Baptista, Alexandra R. Fernandes and M. Luísa Corvo

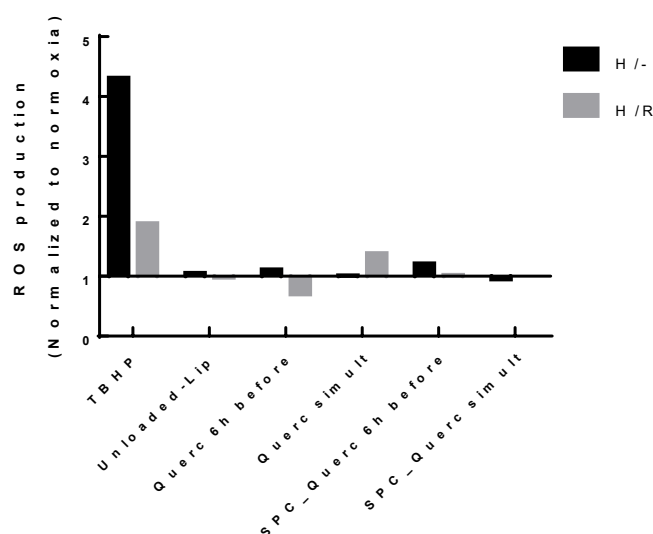

**Figure S1.** Fold change of ROS production in HepG2 cells incubated with 10  $\mu$ M of free quercetin (Querc) or quercetin liposomes (SPC\_Querc) added 6 h before or at the hypoxia onset (simult). Data was analysed at the end of the hypoxia period (H/-) or after the 4 h reperfusion period (H/R). 100  $\mu$ M tert-butyl hydroperoxide (TBHP) was used as a positive control for ROS production and unloaded-liposomes (Unloaded-Lip) were used as vehicle control for SPC\_Querc. Results from a representative experiment are presented. Each condition was normalized to control cells in normoxia.
